**eTable.**  
Methodological Quality Scores of the 26 RCTs<sup>a</sup>

| Measures                                               | RCT                                                            | 1                       | 2                               | 3                | 4                      | 5                         | 6                       | 7                                     | 8                               | 9                    | 10                      | 11                    | 12                         | Total Score | Percentage of Maximum Score |
|--------------------------------------------------------|----------------------------------------------------------------|-------------------------|---------------------------------|------------------|------------------------|---------------------------|-------------------------|---------------------------------------|---------------------------------|----------------------|-------------------------|-----------------------|----------------------------|-------------|-----------------------------|
|                                                        |                                                                | Adequate Randomization? | Concealed Treatment Allocation? | Patient Blinded? | Care Provider Blinded? | Outcome Assessor Blinded? | Dropout Rate Described? | Patients Analyzed in Allocated Group? | No Selective Outcome Reporting? | Similar at Baseline? | Conterventions Avoided? | Adherence Acceptable? | Timing Assessment Similar? |             |                             |
| Standard CR vs no intervention                         | Bertie et al, <sup>16</sup> 1992                               | +/-                     | +/-                             | -                | -                      | +/-                       | +                       | +                                     | +                               | +                    | +/-                     | +/-                   | +                          | 5           | 42                          |
|                                                        | Higgins et al, <sup>25</sup> 2001                              | +/-                     | +/-                             | -                | -                      | +/-                       | +                       | +                                     | +                               | +                    | +/-                     | +/-                   | +                          | 5           | 42                          |
|                                                        | Lidell and Fridlund, <sup>19</sup> 1996                        | +/-                     | +/-                             | -                | -                      | +/-                       | +                       | +                                     | +                               | +                    | +/-                     | +/-                   | +                          | 5           | 42                          |
|                                                        | Naser et al, <sup>21</sup> 2008                                | +                       | +                               | -                | -                      | +/-                       | -                       | +                                     | +                               | +                    | +                       | +/-                   | +                          | 5           | 42                          |
|                                                        | Oldenburger et al, <sup>22</sup> 1995                          | +/-                     | +/-                             | -                | -                      | +/-                       | +                       | +                                     | +                               | +/-                  | +                       | +/-                   | +                          | 5           | 42                          |
|                                                        | Ornish and colleagues, <sup>23,24</sup> 1990+1998 <sup>b</sup> | +/-                     | +/-                             | -                | -                      | +                         | +                       | +                                     | +                               | +                    | -                       | +/-                   | +                          | 6           | 50                          |
|                                                        | Otterstad, <sup>20</sup> 2003                                  | +                       | +/-                             | -                | -                      | +/-                       | -                       | +                                     | +                               | +                    | +                       | +/-                   | +                          | 6           | 50                          |
|                                                        | West et al, <sup>17</sup> 2012                                 | +                       | +/-                             | -                | -                      | -                         | +                       | +                                     | +                               | +                    | -                       | +                     | +                          | 6           | 50                          |
|                                                        | Engblom et al, <sup>18</sup> 1992                              | +/-                     | +/-                             | -                | -                      | +                         | +                       | +                                     | +                               | +                    | +                       | +/-                   | +                          | 7           | 58                          |
|                                                        | Arrigo et al, <sup>29</sup> 2008                               | +/-                     | +/-                             | -                | -                      | -                         | +                       | +                                     | +                               | -                    | +                       | +/-                   | +/-                        | 4           | 33                          |
| Two different durations of CR compared with each other | Hughes et al, <sup>30</sup> 2007                               | +                       | +/-                             | -                | -                      | +/-                       | -                       | +                                     | +                               | +/-                  | +/-                     | +/-                   | +                          | 4           | 33                          |
|                                                        | Carlsson et al, <sup>33</sup> 1997                             | +/-                     | +/-                             | -                | -                      | +/-                       | +                       | +                                     | +                               | +                    | -                       | +/-                   | +                          | 5           | 42                          |
|                                                        | Mildstvedt et al, <sup>32</sup> 2008                           | +/-                     | +/-                             | -                | -                      | +/-                       | +                       | +                                     | +                               | +                    | +/-                     | +/-                   | +                          | 5           | 42                          |
|                                                        | Giannuzzi et al, <sup>34</sup> 2008                            | +                       | +/-                             | -                | -                      | +/-                       | +                       | +                                     | +                               | +                    | +/-                     | +/-                   | +                          | 6           | 50                          |
|                                                        | Janssen et al, <sup>26</sup> 2013                              | +                       | +/-                             | -                | -                      | +/-                       | +                       | +                                     | +                               | +                    | +                       | +                     | +                          | 6           | 50                          |
|                                                        | Pinto et al, <sup>27</sup> 2011                                | +                       | +/-                             | -                | -                      | +/-                       | +                       | +                                     | +                               | +                    | +                       | +/-                   | +                          | 6           | 50                          |
|                                                        | Reid et al, <sup>31</sup> 2005                                 | +                       | +                               | -                | -                      | +                         | +/-                     | +                                     | +                               | -                    | +                       | +                     | +                          | 6           | 50                          |
|                                                        | Lear et al, <sup>35</sup> 2006                                 | +                       | +                               | -                | -                      | +/-                       | +                       | +                                     | +                               | +                    | +                       | +/-                   | +                          | 8           | 67                          |
|                                                        | Moore et al, <sup>28</sup> 2006                                | +                       | +/-                             | -                | -                      | +                         | +                       | +                                     | +                               | +                    | +                       | +/-                   | +                          | 8           | 67                          |
|                                                        | Carlson et al, <sup>41</sup> 2000                              | +/-                     | +/-                             | -                | -                      | +/-                       | +                       | +                                     | +                               | +                    | +                       | +/-                   | +                          | 5           | 42                          |
| Two different types of CR compared with each other     | Izawa et al, <sup>42</sup> 2005                                | +/-                     | +/-                             | -                | -                      | +/-                       | +                       | +                                     | +                               | +                    | +/-                     | +/-                   | +                          | 5           | 42                          |
|                                                        | Tingström et al, <sup>43</sup> 2005                            | +                       | +/-                             | -                | -                      | +/-                       | +                       | +                                     | +                               | +/-                  | +/-                     | +/-                   | +                          | 5           | 42                          |
|                                                        | Jolly et al, <sup>36</sup> 2009                                | +                       | +                               | -                | -                      | +/-                       | +                       | +                                     | +                               | +                    | +/-                     | +                     | +                          | 6           | 50                          |
|                                                        | Oerlid et al, <sup>39</sup> 2011                               | +                       | +/-                             | -                | -                      | -                         | +                       | +                                     | +                               | +                    | +/-                     | +/-                   | +                          | 6           | 50                          |
|                                                        | Hansen et al, <sup>40</sup> 2008                               | +                       | +/-                             | -                | -                      | -                         | +                       | +                                     | +                               | +                    | +/-                     | +                     | +                          | 7           | 58                          |
|                                                        | Smith and colleagues, <sup>37,38</sup> 2004+2011 <sup>b</sup>  | +                       | +                               | -                | -                      | +                         | +                       | +                                     | +                               | +                    | +                       | +/-                   | +                          | 9           | 75                          |

<sup>a</sup> RCT=randomized clinical trial, CR=cardiac rehabilitation, +=yes, -=no, +/-=unsure.  
<sup>b</sup> Multiple publications on data of the same RCT and population are scored as originating from a single RCT.
